# Supplementary material for: miR-381-3p contribution in mouse spontaneous abortion via targeting VEGFA
Source: PeerJ journal article supplement (doi:10.7717/peerj.19568), 2025-06-24
Supplement: Figure_5A.zip [file Figure_5A.zip]

## Sheet: Placenta weight
Placenta weight (g)
		1	2	3	4	5
control	1	0.203	0.178	0.181	0.172	0.195
	2	0.191	0.182	0.178	0.171	0.171
	3	0.206	0.18	0.172	0.176	0.176
	4	0.181	0.187	0.174	0.181	0.181
	5	0.196	0.168	0.17	0.174	0.186
	X	0.1954	0.179	0.175	0.1748	0.1818
	SD	0.00996494	0.007	0.00447214	0.00396232	0.00925743
abortion	1	0.123	0.168	0.118	0.121	0.024
	2	0.115	0.162	0.123	0.126	0.018
	3	0.12	0.142	0.126	0.118	0.012
	4	0.122	0.146	0.113	0.116	0.088
	5	0.126	0.151	0.12	0.127	0.123
	X	0.1212	0.1538	0.12	0.1216	0.053
	SD	0.00408656	0.0109179	0.00494975	0.00482701	0.049679
	P	1.30834e-05	0.00359848	8.68483e-08	9.25517e-08	0.00381339
abortion+	1	0.153	0.158	0.152	0.155	0.148
shmiR-381-3p	2	0.164	0.164	0.159	0.143	0.135
	3	0.172	0.138	0.146	0.159	0.151
	4	0.169	0.142	0.156	0.163	0.143
	5	0.183	0.156	0.161	0.152	0.147
	X	0.1682	0.1516	0.1548	0.1544	0.1448
	SD	0.0109864	0.0110815	0.00597495	0.00760263	0.00618061
	P	0.00350484	0.00250247	0.000412546	0.0017719	0.000147933

## Sheet: Fetal weight
Fetal weight (g)
		1	2	3	4	5
control	1	0.826	0.769	0.775	0.768	0.768
	2	0.837	0.803	0.803	0.811	0.789
	3	0.819	0.758	0.791	0.831	0.784
	4	0.726	0.772	0.784	0.826	0.769
	5	0.751	0.751	0.764	0.794	0.776
	X	0.7918	0.7706	0.7834	0.806	0.7772
	SD	0.0498668	0.0199825	0.0149097	0.0256807	0.00920326
abortion	1	0.466	0.524	0.326	0.411	0.134
	2	0.426	0.406	0.337	0.426	0.106
	3	0.455	0.625	0.346	0.386	0.112
	4	0.413	0.613	0.331	0.356	0.124
	5	0.034	0.573	0.342	0.378	0.835
	X	0.3588	0.5482	0.3364	0.3914	0.2622
	SD	0.182821	0.0887677	0.00808084	0.0275826	0.320388
	P	0.00475543	0.00410599	1.02289e-09	8.54677e-09	0.02284
abortion+	1	0.746	0.561	0.604	0.505	0.516
shmiR-381-3p	2	0.625	0.683	0.483	0.592	0.593
	3	0.684	0.706	0.503	0.537	0.547
	4	0.771	0.724	0.462	0.513	0.587
	5	0.692	0.719	0.511	0.611	0.524
	X	0.7036	0.6786	0.5126	0.5516	0.5534
	SD	0.0570903	0.0676262	0.0545096	0.0475268	0.0353596
	P	0.0320054	0.0357275	0.000200808	3.65918e-05	7.26729e-05
