# Supplementary material for: miR-381-3p contribution in mouse spontaneous abortion via targeting VEGFA
Source: PeerJ. 2025 Jun 24;13:e19568. doi: 10.7717/peerj.19568 (PMC12204090; doi:10.7717/peerj.19568)
Supplement: Supplemental Information 11 [file peerj-13-19568-s011.xls]

## Sheet: Sheet1
ITEM TO CHECK	IMPORTANCE	CHECKLIST
EXPERIMENTAL DESIGN
Definition of experimental and control groups	E	Line 113, 163-164
Number within each group	E	Line 113, 163-164
Assay carried out by core lab or investigator's lab?	D	NA
Acknowledgement of authors' contributions	D	NA
SAMPLE
Description	E	Line 174-176
Volume/mass of sample processed	D	Line 174-176
Microdissection or macrodissection	E	Line 174-176
Processing procedure	E	Line 174-176
If frozen - how and how quickly?	E	Line 174-176
If fixed - with what, how quickly?	E	NA
Sample storage conditions and duration (especially for FFPE samples)	E	Line 174-176
NUCLEIC ACID EXTRACTION
Procedure and/or instrumentation	E	Line 182-191
Name of kit and details of any modifications	E	Line 182-191
Source of additional reagents used	D	Line 182-191
Details of DNase or RNAse treatment	E	Line 182-191
Contamination assessment (DNA or RNA)	E	Line 182-191
Nucleic acid quantification	E	Line 182-184
Instrument and method	E	Line 182-184
Purity (A260/A280)	D	MISS
Yield	D	Line 182-184
RNA integrity method/instrument	E	Line 182-184
RIN/RQI or Cq of 3' and 5' transcripts	E	SM
Electrophoresis traces	D	NO
Inhibition testing (Cq dilutions, spike or other)	E	NO
REVERSE TRANSCRIPTION
Complete reaction conditions	E	SM
Amount of RNA and reaction volume	E	SM
Priming oligonucleotide (if using GSP) and concentration	E	SM
Reverse transcriptase and concentration	E	SM
Temperature and time	E	SM
Manufacturer of reagents and catalogue numbers	D	Line 182-191
Cqs with and without RT	D*	MISS
Storage conditions of cDNA	D	SM
qPCR TARGET INFORMATION
If multiplex, efficiency and LOD of each assay.	E	SM
Sequence accession number	E	Line 193-196
Location of amplicon	D	NO
Amplicon length	E	Line 193-196
In silico specificity screen (BLAST, etc)	E	SM
Pseudogenes, retropseudogenes or other homologs?	D	NA
Sequence alignment	D	MISS
Secondary structure analysis of amplicon	D	MISS
Location of each primer by exon or intron (if applicable)	E	NA
What splice variants are targeted?	E	NA
qPCR OLIGONUCLEOTIDES
Primer sequences	E	Line 193-196
RTPrimerDB Identification Number	D	NA
Probe sequences	D**	NA
Location and identity of any modifications	E	NA
Manufacturer of oligonucleotides	D	Line 193-196
Purification method	D	MISS
qPCR PROTOCOL
Complete reaction conditions	E	SM
Reaction volume and amount of cDNA/DNA	E	SM
Primer, (probe), Mg++ and dNTP concentrations	E	SM
Polymerase identity and concentration	E	SM
Buffer/kit identity and manufacturer	E	SM
Exact chemical constitution of the buffer	D	MISS
Additives (SYBR Green I, DMSO, etc.)	E	SM
Manufacturer of plates/tubes and catalog number	D	SM
Complete thermocycling parameters	E	Line 187-190
Reaction setup (manual/robotic)	D	Line 187-190
Manufacturer of qPCR instrument	E	Line 189-191
qPCR VALIDATION
Evidence of optimisation (from gradients)	D	MISS
	E	SM
For SYBR Green I, Cq of the NTC	E	SM
Standard curves with slope and y-intercept	E	SM
PCR efficiency calculated from slope	E	SM
Confidence interval for PCR efficiency or standard error	D	MISS
r2 of standard curve	E	SM
Linear dynamic range	E	MISS
Cq variation at lower limit	E	NA
Confidence intervals throughout range	D	NA
Evidence for limit of detection	E	NA
If multiplex, efficiency and LOD of each assay.	E	NA
DATA ANALYSIS
qPCR analysis program (source, version)	E	SM
Cq method determination	E	Line 191-193, SM
Outlier identification and disposition	E	SM
Results of NTCs	E	SM
Justification of number and choice of reference genes	E	Line 191
Description of normalisation method	E	Line 191-193, SM
Number and concordance of biological replicates	D	Line 193
Number and stage (RT or qPCR) of technical replicates	E	MISS
Repeatability (intra-assay variation)	E	NO
Reproducibility (inter-assay variation, %CV)	D	NO
Power analysis	D	NO
Statistical methods for result significance	E	Line 234-235
Software (source, version)	E	Line 233
Cq or raw data submission using RDML	D	SM
Table 1. MIQE checklist for authors, reviewers and editors. All essential information (E) must be submitted with the manuscript. Desirable
information (D) should be submitted if available. If using primers obtained from RTPrimerDB, information on qPCR target, oligonucleotides,
protocols and validation is available from that source.
*: Assessing the absence of DNA using a no RT assay is essential when first extracting RNA. Once the sample has been validated as
RDNA-free, inclusion of a no-RT control is desirable, but no longer essential.
**: Disclosure of the probe sequence is highly desirable and strongly encouraged. However, since not all commercial pre-designed assay
vendors provide this information, it cannot be an essential requirement. Use of such assays is advised against.
NA Not applicable.
MISS Test was performed but evidence is missing
NO Information is not available
SM Information is provided in Supplementary Materials
